# Supplementary material for: Vagus Nerve Stimulation Modulates Inflammation in Treatment-Resistant Depression Patients: A Pilot Study
Source: MDPI journal article supplement (doi:10.3390/ijms25052679), 2024-02-26
Supplement: s1 [file s1]

| <i>ID</i> | <i>Date of surgery</i> | <i>years from diagnosis</i> | <i>Supplements</i>          | <i>Diet</i> | <i>Smoking</i>       | <i>BMI</i> | <i>Sample collection date</i> | <i>VNS Parameters</i>                   |
|-----------|------------------------|-----------------------------|-----------------------------|-------------|----------------------|------------|-------------------------------|-----------------------------------------|
| 1         | 19/11/2007             | 11.00                       | Centrum, Metamucil, Catvate | Regular     | No                   | 27.77      | 18/08/2015                    | 2.0 mA, 30 Hz, 500 $\mu$ s, 30 s/5 min  |
| 2         | 03/06/2008             | 2.00                        | None                        | Regular     | 11-25 cigarettes/day | 25-30      | 09/06/2015                    | 1.25 mA, 30 Hz, 250 $\mu$ s, 30 s/5 min |
| 3         | 13/08/2008             | 2.00                        | Oméga 3                     | Regular     | No                   | 25-30      | 01/09/2015                    | 1.0 mA, 30 Hz, 500 $\mu$ s, 30 s/5 min  |
| 4         | 20/10/2008             | 5.00                        | None                        | Regular     | < 25 cigarettes /day | 25-30      | 17/08/2015                    | 2.0 mA, 30 Hz, 250 $\mu$ s, 30 s/5 min  |
| 5         | 30/10/2009             | 1.00                        | Omega 3                     | Regular     | No                   | 21.11      | 18/08/2015                    | 0.5 mA, 20 Hz, 250 $\mu$ s, 30 s/5 min  |
| 6         | 06/04/2010             | 15.00                       | None                        | Regular     | No                   | 30.11      | 14/04/2015                    | 1.75 mA, 30 Hz, 250 $\mu$ s, 30 s/5 min |
| 7         | 24/11/2010             | 6.00                        | None                        | Regular     | 25 cigarettes/day    | 30-35      | 21/07/2015                    | 2.25 mA, 25 Hz, 250 $\mu$ s, 30 s/3 min |
| 8         | 03/11/2014             | 20.00                       | None                        | Regular     | No                   | 37.66      | 04/05/2015                    | 1.25 mA, 30 Hz, 500 $\mu$ s, 30 s/5 min |

Table S1: Clinical, biological characteristics and VNS settings of the patients
